# Supplementary material for: Enhancement of the up-conversion luminescence of Yb3+/Er3+ or Yb3+/Tm3+ co-doped NaYF4 nanoparticles by photonic crystals
Source: Royal Society of Chemistry journal article supplement (doi:10.1039/c3tc30895b), 2013-01-01
Supplement: c3tc30895b.pdf [file c3tc30895b.pdf]

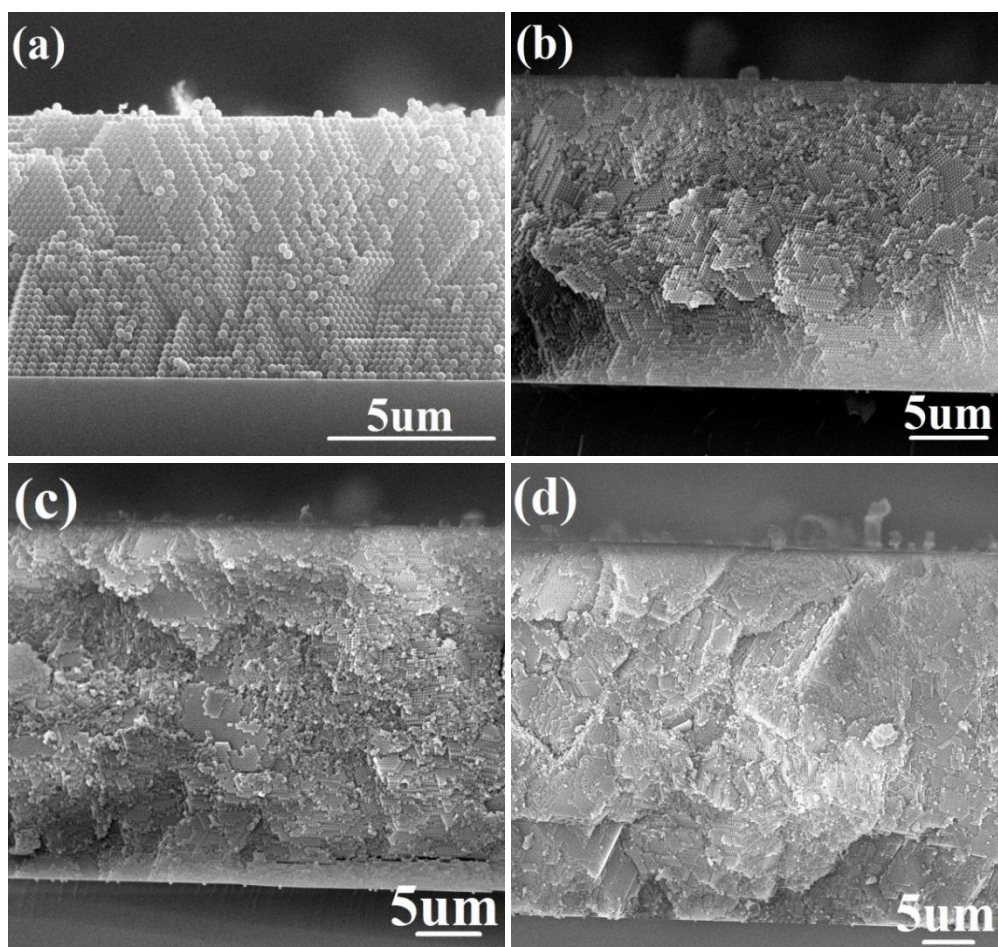

Fig.1 the cross-section SEM images of PC-II photonic crystal with various thicknesses

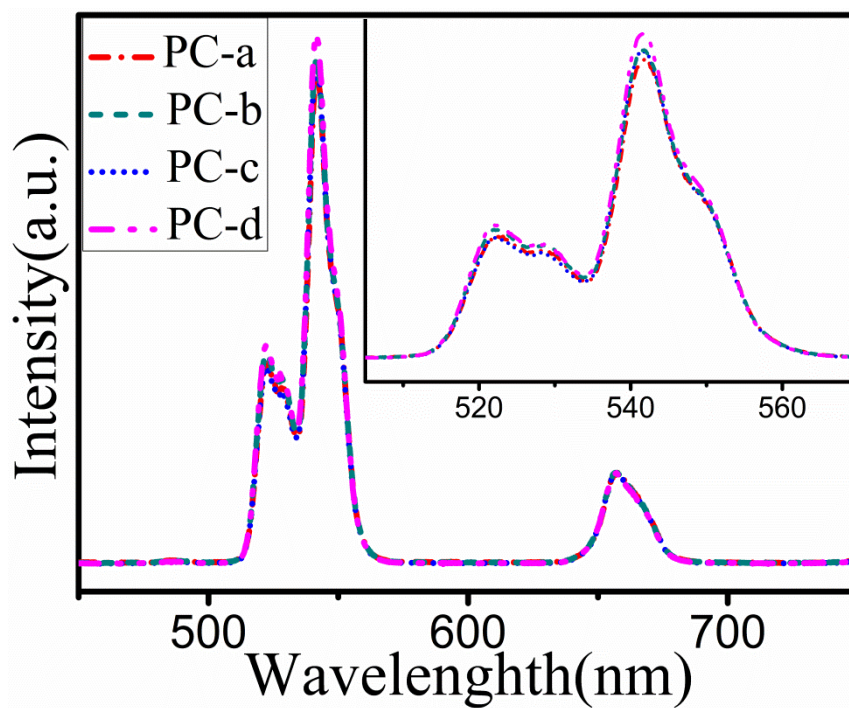

Fig.2 the UC emission spectra of  $\text{NaYF}_4:\text{Yb}^{3+}, \text{Er}^{3+}$  on the surface of PC-II with the various thicknesses
